# Supplementary material for: Target-Driven Evolution of Scorpion Toxins
Source: PubMed Central journal article supplement (PMC4595728; doi:10.1038/srep14973), 2015-10-07
Supplement: srep14973-s1.pdf [file srep14973-s1.pdf]

## Target-Driven Evolution of Scorpion Toxins

Shangfei Zhang, Bin Gao & Shunyi Zhu



**Figure S1. Multiple sequence alignment (MSA) of the *Mesobuthus martensii*  $\alpha$ -toxins.** Apart from BmKM1 and BmKM4, two extensively studied toxins (1,2), all the other sequences are provided in their GenBank ID numbers (<http://www.ncbi.nlm.nih.gov/>) for avoiding confusion of their names. Clone BmL398 was isolated from a venom gland cDNA library of this scorpion species by our lab. Cysteines are shadowed in yellow and four disulfide bridges indicated by lines. Extra amino acids that will be removed after post-translational processing are underlined once and C-terminal amidation is indicated by an asterisk.

gi|699624821|*P. pubescens* KQAFDISIMILICLNMTMMVE TDDQSEDMENILYWINI VFIVLFTGECVLKLI SLRHYFFYFTIGWNI FDFVVVILSIVGMFLA--EMIEKYFV SPTLFRVIRLARIGRILRLIKGAKG  
 gi|699624906|*P. pubescens* KQAFDIVIMVLICLNMTMMIE TDDQSKLMQDILYWINI VFVVLFTGECVFKL FSLRYYYFTIGWNI FDFVVVILSIIIGMFLA--EMIEKYFV SPTLFRVIRLARIGRILRLVKGAKG  
 gi|699624877|*P. pubescens* QQVFDISIMILICLNMTMMVE TDDQSEEMENILYWINI VFIVLFTGECVLKLI SLRHYFFYFTIGWNI FDFVVVILSIVGMFLA--EMIEKYFV SPTLFRVIRLARIGRILRLIKGAKG  
 gi|699689265|*P. pubescens* QQAFDIVIMMLICLNMTMMVE TDTQSKQMEDILYWINI VFVIFFTCECVLKM FALRHYFFYFTIGWNI FDFVVVILSIVGMFLA--EIIIEKYFV SPTLFRVIRLARIGRILRLIKGAKG  
 gi|699649878|*P. pubescens* KQAFDVSIMILICLNMTMMVE TDDQSQEKVNI LHKINMLFVAIFTGECI FKM LALRHYFFYFTNGWNI FDFVVVILSIVGTVLS--DIIQKYFF SPTLFRVIRLARIGRILRLIRGAKG  
 gi|823463918|*T. guttata* KQAFDISIMILICLNMTMMVE TDDQSEDMENILYWINI VFIVLFTGECVFLKLI SLRHYFFYFTIGWNI FDFVVVILSIVGMFLA--EMIEKYFV SPTLFRVIRLARIGRILRLIKGAKG  
 gi|823463780|*T. guttata* QQLFDITVMVLICLNMTMMIE TDDQTELEKQNI LYWINI VFVVLFTGECVFKI FSLRYYYFTIGWNI FDFVVVILSIIIGMFLA--EVIEKYFV SPTLFRVIRLARIGRILRLIKGAKG  
 gi|823473529|*T. guttata* QQAFDIVIMMLICLNMTMMVE TDTQSKQMEDILYWINI VFVIFFTCECVLKM FALRHYFFYFTIGWNI FDFVVVILSIVGMFLA--EIIIEKYFV SPTLFRVIRLARIGRILRLIKGAKG  
 gi|449491396|*T. guttata* KQVFDITIMILICLNMTMMVE TDDQSELKTSVLYKINI VFIVIFTGECV LKM FALRHYFFYFTIGWNI FDFVVVILSILGIVLS--DIIIEKYFV SPTLFRVIRLARIGRVLRLIRGAKG  
 gi|449492116|*T. guttata* KQAFDVSIMILICLNMTMMVE TDDQSQEKVNI LHKINMLFVAIFTGECI FKM LALRHYFFYFTNGWNI FDFVVVILSIVGTVLS--DIIQKYFF SPTLFRVIRLARIGRILRLIRGAKG  
 gi|699632948|*C. vociferus* KQAFDITIMVLICLNMTMMIE TDDQSELMQNI LYWINI VFVVLFTGECVFKM FSLRYYYFTIGWNI FDFVVVILSIVGMFLA--KVIEKYFV SPTLFRVIRLARIGRILRLIKGAKG  
 gi|699632975|*C. vociferus* QQVFDISIMILICLNMTMMVE TDDQSKEMENILYWINI VFIVLFTGECV LKLI SLRHYFFYFTIGWNI FDFVVVILSIVGMFLA--EMIEKYFV SPTLFRVIRLARIGRILRLIKGAKG  
 gi|699677371|*C. vociferus* KQAFDVSIMILICLNMTMMVE TDDQSQEKVNI LHKINMLFVAIFTGECI FKM LALRHYFFYFTNGWNI FDFVVVILSIVGTVLS--DIIQKYFF SPTLFRVIRLARIGRILRLIRGAKG  
 gi|699659219|*C. vociferus* KQVFDITIMILICLNMTMMVE TDDQSELKTSVLYKINI VFIVIFTGECV LKM FALRYYYFTIGWNI FDFVVVILSILGIVLS--DIIIEKYFV SPTLFRVIRLARIGRVLRLIRGAKG  
 gi|543245193|*G. fortis* KQAFDISIMILICLNMTMMVE TDDQSEEMENILYWINI VFIVLFTGECVFLKLI SLRHYFFYFTIGWNI FDFVVVILSIVGMFLA--EMIEKYFV SPTLFRVIRLARIGRILRLIKGAKG  
 gi|543298808|*G. fortis* KQVFDITIMILICLNMTMMVE TDDQSELKTSVLYKINI VFIVIFTGECV LKM FALRHYFFYFTIGWNI FDFVVVILSILGIVLS--DIIIEKYFV SPTLFRVIRLARIRRLRRLGRGACT  
 gi|647570007|*G. gallus* KQAFDIGIMVLICLNMTMMIE TDDQSELMQNI LYWINI VFVVLFTGECV LKLI FSLRYYYFTIGWNI FDFVVVILSIVGMFLA--KVIEKYFV SPTLFRVIRLARIGRILRLIKGAKG  
 gi|342837673|*G. gallus* KQVFDITIMILICLNMTMMVE TDDQSEKTDILYKINI VFIVIFTGECV LKM FALRYYYFTIGWNI FDFVVVILSIIAGIVLS--DIIIEKYFV SPTLFRVIRLARIGRVLRLIRGAKG  
 gi|543348889|*P. humilis* KQVFDISIMILICLNMTMMVE TDDQSKEMETILSRINI VFIVLFTGECVFLKLI SLRHYFFYFTIGWNI FDFVVVILSIVGMFLA--EMIEKYFV SPTLFRVIRLARIGRILRLIKGAKG  
 gi|541981351|*F. cherrug* KQAFDIAIMVLICLNMTMMIE TDDQSDLMQNI LYWINI VFVVLFTGECVFKM FSLRYYYFTIGWNI FDFVVVILSIVGMFLA--KVIEKYFV SPTLFRVIRLARIGRILRLIKGAKG  
 gi|541971530|*F. cherrug* KQVFDITIMILICLNMTMMVE TDDQSELKTSVLYMINI VFIVIFTGECV LKM LALRYYYFTIGWNI FDFVVVILSILGIVLS--DIIIEKYFV SPTLFRVIRLARIGRVLRLIRGAKG  
 gi|696965978|*C. canorus* KQAFDITIMVLICLNMTMMIE TDDQSQQLMQDILYWINI VFVVLFTGECI LKM FSLRYYYFTIGWNI FDFVVVILSIIIGMFLA--DVIEKYFV SPTLFRVIRLARIGRILRLIKGAKG  
 gi|696965919|*C. canorus* KQVFDISIMILICLNMTMMVE TDDQSKEMEALISWINI VFII LFTGECVFLKLI SLRHYFFYFTIGWNI FDFVVVILSIVGMFLA--EMIEKYFV SPTLFRVIRLARIGRILRLIKGAKG  
 gi|696965965|*C. canorus* QQVFDISIMILICLNMTMMVE TDDQSKEMENILSWINI VFIVLFTGECV LKLI SLRHYFFYFTIGWNI FDFVVVILSIVGMFLA--EMIEKYFV SPTLFRVIRLARIGRILRLIKGAKG  
 gi|696998543|*C. canorus* KQVFDITIMILICLNMTMMVE TDDQSELKTSILYKINI VFIVIFTGECV LKM FALRYYYFTIGWNI FDFVVVILSILGIVLS--DIIIEKYFV SPTLFRVIRLARIGRVLRLIRGAKG  
 gi|683906241|*S. canaria* KQLFDIIMVLICLNMTMMIE TDDQNELMQNI LYWINI VFVVLFTGECVFKI FSLRYYYFTIGWNI FDFVVVILSIIIGMFLA--EVIEKYFV SPTLFRVIRLARIGRILRLIKGAKG  
 gi|669281868|*C. brachyrhynchus* KQVFDITIMILICLNMTMMVE TDDQSELKTSVLYKINI VFIVIFTGECV LKM FALRYYYFTIGWNI FDFVVVILSILGIVLS--DIIIEKYFV SPTLFRVIRLARIGRVLRLIRGAKG  
 gi|669281061|*C. brachyrhynchus* RQLFDITVMVLICLNMTMMIE TDDQTELEKQNI LYWINI VFVVLFTGECVFKI FSLRYYYFTIGWNI FDFVVVILSIIIGMFLA--EVIEKYFV SPTLFRVIRLARIGRILRLIKGAKG  
 gi|726994909|*C. cornix* KQVFDITIMILICLNMTMMVE TDDQSELKTSVLYKINI VFIVIFTGECV LKM FALRYYYFTIGWNI FDFVVVILSILGIVLS--DIIIEKYFV SPTLFRVIRLARARRRRGMRLIRGAKG  
 gi|719771801|*T. guttatus* KQAFDISIMILICLNMTMMVE TDDQSKEMENILYWINI VFIVLFTGECVFLKLI SLRHYFFYFTIGWNI FDFVVVILSIVGMFLA--EMIEKYFV SPTLFRVIRLARIGRILRLIKGAKG  
 gi|719770223|*T. guttatus* QQVFDISIMILICLNMTMMVE TDDQSEDMENILYWINI VFIVLFTGECV LKLI SLRHYFFYFTIGWNI FDFVVVILSIVGMFLA--EMIEKYFV SPTLFRVIRLARIGRILRLIKGAKG  
 gi|719776079|*T. guttatus* QQAFDIVIMMLICLNMTMMVE TDTQSKQMENILYWINI VFVIFFTCECVLKM FALRHYFFYFTIGWNI FDFVVVILSIVGMFLA--EIIIEKYFV SPTLFRVIRLARIGRILRLIKGAKG  
 gi|719730318|*T. guttatus* KQVFDITIMILICLNMTMMVE TDDQSQKTDVLYKINI VFIVIFTGECV LKM FALRYYYFTIGWNI FDFVVVILSIVGIVLS--DIIIEKYFV SPTLFRVIRLARIGRVLRLIRGAKG  
 gi|719791574|*T. guttatus* KQAFDVSIMILICLNMTMMVE TDDQSQEKVNI LHKINMLFVAIFTGECI FKM VALRHYFFYFTNGWNI FDFVVVILSIVGTVLS--DIIQKYFF SPTLFRVIRLARIGRILRLIRGAKG  
 gi|543743408|*C. livia* KQIFDVSIMILICLNMTMMVE TDDQSQEKVNI LHKINMLFVAIFTGECI FKM LALRHYFFYFTNGWNI FDFVVVILSIVGTVLS--DIIQKYFF SPTLFRVIRLARIGRILRLIRGAKG  
 gi|697486596|*S. camelus* KQVFDISIMILICLNMTMMVE TDDQSKEMETILSRINI VFII LFTGECV LKLI SLRHYFFYFTIGWNI FDFVVVILSIVGMFLA--EMIEKYFV SPTLFRVIRLARIGRILRLIKGAKG  
 gi|697486691|*S. camelus* KQAFDISIMVLICLNMTMMIE TDDQSELMQNI LYWINI VFVVLFTGECV LKLI FSLRYYYFTIGWNI FDFVVVILSIVGMFLA--KVIEKYFV SPTLFRVIRLARIGRILRLIKGAKG  
 gi|697513240|*S. camelus* KQVFDITIMILICLNMTMMVE TDDQSQFKTDVLYKINI VFIVIFTGECV LKM FALRYYYFTIGWNI FDFVVVILSIVGIVLS--DIIIEKYFV SPTLFRVIRLARIGRVLRLIRGAKG  
 gi|690446304|*P. adeliae* KQAFDITIMVLICLNMTMMIE TDDQGELMQNI LYWINI VFVVLFAGECVFKL FSLRYYYFTIGWNI FDFVVVILSVVGMFLA--KVIEKYFV SPTLFRVIRLARIGRILRLIKGAKG  
 gi|690439493|*P. adeliae* KQAFDVSIMILICLNMTMMVE TDDQSQEKVNI LHKINMLFVAVFTGECI FKM LALRHYFFYFTNGWNI FDFVVVILSIVGTVLS--DIIQKYFF SPTLFRVIRLARIGRILRLIRGAKG

gi|690428680|*P. adeliae*  
gi|514743636|*A. platyrhynchos*  
gi|514743648|*A. platyrhynchos*  
gi|514755303|*A. platyrhynchos*  
gi|729721552|*H. leucocephalus*  
gi|701390492|*C. pelagica*  
gi|701375204|*C. pelagica*  
gi|701406438|*C. pelagica*  
gi|705688749|*C. macqueenii*  
gi|705668534|*C. macqueenii*  
gi|705671331|*C. macqueenii*  
gi|705695710|*C. macqueenii*  
gi|527269695|*M. undulatus*  
gi|527269392|*M. undulatus*  
gi|527269353|*M. undulatus*  
gi|700400984|*O. hoazin*  
gi|700375357|*O. hoazin*  
gi|663239565|*C. anna*  
gi|663288339|*C. anna*  
gi|675430434|*M. vitellinus*  
gi|675407061|*M. vitellinus*  
gi|704177515|*B. rhinoceros*  
gi|704199054|*B. rhinoceros*  
gi|704169897|*B. rhinoceros*  
gi|542150274|*Z. albicollis*  
gi|733922787|*M. gallopavo*  
gi|733891677|*M. gallopavo*  
gi|686594368|*A. forsteri*  
gi|686594360|*A. forsteri*  
gi|704329645|*C. carolinensis*  
gi|704298804|*C. carolinensis*  
gi|683461587|*C. carolinensis*  
gi|699582281|*A. vittatum*  
gi|699600245|*A. vittatum*  
gi|723125282|*P. lepturus*  
gi|678145895|*T. erythrolophus*  
gi|698441979|*G. stellata*  
gi|697017762|*F. glacialis*  
gi|698407580|*C. cristata*  
gi|677983296|*A. chloris*

KQVFDITIMILICLNMTMMVETDDQSELKTSVLYKINLVFIVIFTGECCLKMFALRYYYFTIGWNI FDFV VVILSILGIVLS--DIEEKYFVSPTLFRVIRLARIGRVLRLIRGAKG  
KQAFDISIMVLICLNMTMMIETDDQGDLMONILYWINLVFVVLFTGECVFKLFSRLYYYFTIGWNI FDFV VVILSIVGMFLA--KVIEKYFVSPTLFRVVRLARIGRILRLIKGAKG  
QQAFDISIMILICLNMTMMVETDDQSKEMENILYWINLVFIVLFTGECVCLKLISLRHYYFTIGWNI FDFV VVILSIVGMFLA--EMIEKYFVSPTLFRVIRLARIGRILRLIKGAKG  
KQVFDITIMILICLNMTMMVETDDQSELKTDILYKINLVFIVIFTGECVCLKMFALRYYYFTIGWNI FDFV VVILSIVGMFLA--DIEEKYFVSPTLFRVIRLARIGRVLRLIRGAKG  
KQAFDITIMVLICLNMTMMIETDDQGELMONILYWINLVFVVLFTGECVCLKLFSRLYYYFTIGWNI FDFV VVILSIVGMFLA--KVIEKYFVSPTLFRVVRLARIGRILRLIKGAKG  
KQAFDITIMVLICLNMTMMIETDDQSKMEDILYWINLVFVIFFTCECVLKMFLRHYFTIGWNI FDFV VVILSIVGMFLA--EIEEKYFVSPTLFRVIRLARIGRILRLIKGAKG  
KQVFDITIMILICLNMTMMVETDDQSELKTSVLYKINLVFIVIFTGECVCLKMFALRHYFTIGWNI FDFV VVILSILGIVLS--DIEEKYFVSPTLFRVIRLARIGRVLRLIRGAKG  
KQAFDITIMVLICLNMTMMIETDDQGELMKSILYWINLVFVVLFTGECVCLKLFSRLYYYFTIGWNI FDFV VVILSIVGMFLA--KVIEKYFVSPTLFRVVRLARIGRILRLRIQGA  
QQVFDISIMILICLNMTMMVETDDQSKEMETILYWINLVFIVLFTGECVCLKLISLRHYYFTIGWNI FDFV VVILSIVGMFLA--EMIEKYFVSPTLFRVIRLDRIGRILRLIKGAKG  
KQVFDITIMILICLNMTMMVETDDQSDLKTSVLYKINLVFIVIFTGECVCLKMFALRYYYFTIGWNI FDFV VVILSILGIVLS--DIEEKYFVSPTLFRVIRLARIGRVLRLIRGAKG  
KQAFDVSIMILICLNMTMMVETDDQSQEKVNILHKINMLFVAIFTGECIKMLALRHYFTNGWNI FDFV VVILSIVGTVLS--DIIQKYFFSPTLFRVIRLARIGRVLRLIRGAKG  
KQAFDISIMILICLNMTMMVETDDQSEDMENILYWINLVFIVLFTGFEVCLKLISLRHYYFTIGWNI FDFV VVILSIVGMFLA--EMIEKYFVSPTLFRVIRLARIGRILRLIKGAKG  
KQVFDISIMILICLNMTMMVETDDQSKEMETILSRINLVFIILFTGECVCLKLISLRHYYFTIGWNI FDFV VVILSIVGMFLA--EMIEKYFVSPTLFRVIRLARIGRILRLIKGAKG  
KQAFDITIMVLICINMITMMIETDDQAELEMONILYWINLVFVVLFTGECVCLKLFSRLYYYFTIGWNI FDFV VVILSIVGMFLA--KVIEKYFVSPTLFRVIRLARIGRILRLIRGAKG  
KQAFDVSIMILICLNMTMMVETDDQSQEKVNILHKINMLFVAIFTGECIKMLALRHYFTNGWNI FDFV VVILSIVGTVLS--DIIQKYFFSPTLFRVIRLARIGRVLRLIRGAKG  
KQVFDITIMILICLNMTMMVETDDQSELKTSVLYKINLVFIVIFTGECVCLKMFALRYYYFTIGWNI FDFV VVILSILGIVLS--DIEEKYFVSPTLFRVIRLARIGRVLRLIRGAKG  
KQVFDISIMILICLNMTMMVETDDQSKEMETILSRINLVFIILFTGFEVCLKLISLRHYYFTIGWNI FDFV VVILSIVGMFLA--EMIEKYFVSPTLFRVIRLARIGRILRLIKGAKG  
KQVFDITIMILICLNMTMMVETDDQSELKTAVLYKINLVFIVIFTGECVCLKMFALRHYFTIGWNI FDFV VVILSILGIVLS--DIEEKYFVSPTLFRVIRLARIGRVLRLIRGAKG  
KQVFDISIMILICLNMTMMVETDDQSKEMETILSRINLVFIILFTGFEVCLKLISLRHYYFTIGWNI FDFV VVILSIVGMFLA--EMIEKYFVSPTLFRVIRLARIGRILRLIKGAKG  
KQVFDITIMILICLNMTMMVETDDQSELKTSVLYKINLVFIVIFTGECVCLKMFALHYHFFTVGWNI FDFV VVILSILGIVLS--DIEEKYFVSPTLFRVIRLARIGRVLRLIRGAKG  
KQVFDISIMILICLNMTMMVETDDQSKEMEILSRINLVFIILFTGFEVCLKLISLRHYYFTIGWNI FDFV VVILSIVGMFLA--EMIEKYFVSPTLFRVIRLARIGRILRLIKGAKG  
KQAFDITIMVLICLNMTMMIETDDQGERMODILYWINLVFVVLFTGECVFKMFLSRYYYFTIGWNI FDFV VVILSIIIGTCLD--EMIQKYFVSPTLFRVIRLARIGRILRLIKGAKG  
KQVFDITIMILICLNMTMMVETDDQSEFKTSILNKINLVFIVIFTGECVCLKMFALRYYYFTIGWNI FDFV VVILSIVGMFLA--DIEEKYFVSPTLFRVIRLARIGRVLRLIRGAKG  
KQVFDISIMILICLNMTMMVETDDQSKEMETILSRINLVFIVLFTGFEVCLKLISLRHYYFTIGWNI FDFV VVILSIVGMFLA--EMIEKYFVSPTLFRVIRLARIGRILRLIKGAKG  
KQVFDITIMILICLNMTMMVETDDQSETKTDILYKINLVFIVIFTGECVCLKMFALRYYYFTIGWNI FDFV VVILSIVGMFLA--DIEEKYFVSPTLFRVIRLARIGRVLRLIRGAKG  
NQAFDIAIMILICLNMTMMVETYEQSDTKTNVLNKINLVFVAIFTTECILKLVALRQYYFSNAWNI FDI VVIMSLVALLLSGIGKAFEHFLPPTLFRVIRLARIGRILRLIRAAGK  
KQAFDISIMILICLNMTMMVETDDQSEDMENILYWINLVFIVLFTGECVCLKLISLRHYYFTIGWNI FDFV VVILSIVGMFLA--EMIEKYFVSPTLFRVIRLARIGRILRLIKGAKG  
QQVFDISIMILICLNMTMMVETDDQSKEMENILYWINLVFIVLFTGECVCLKLISLRHYYFTIGWNI FDFV VVILSIVGMFLA--EMIEKYFVSPTLFRVSSDRIGRILRLIKGAKG  
KQAFDITIMVLICLNMTMMIETDDQSEMMOHILYWINLVFVVLFTGECVFKLFSRLYYYFTIGWNI FDFV VVILSIVGMFLA--KVIEKYFVSPTLFRVVRLARIGRILRLIKGAKG  
KQVFDITIMILICLNMTMMVETDDQSEAKTSVLYKINLVFIVIFTGECVCLKMFALRYYYFTIGWNI FDFV VVILSILGIVLS--DIEEKYFVSPTLFRVIRLARIGRVLRLIRGAKG  
RQAFDVSIMILICLNMTMMVETYEQSEKSNILNKINMLFVALFTTECVLKLVALRQYYFSNAWNI FDL VVIMSLVALLLSGIGKAFEHFLPPTLFRVIRLARIGRILRLIRAAGK  
QQAFDIVIMMLICLNMTMMVETDTQSEQMEDILYWINLVFVIFFTCECVLKMFLRHYFTIGWNI FDFV VVILSIVGMFLA--EIEEKYFVSPTLFRVIRLARIGRILRLIKGAKG  
KQVFDITIMILICLNMTMMVETDDQSELKTSVLYKINLVFIVIFTGECVCLKMFALRYYYFTIGWNI FDFV VVILSILGIVLS--DIEEKYFVSPTLFRVIRLARIGRVLRLIRGAKG  
KQAFDITIMVLICLNMTMMIETDDQGELMONILYWINLVFVVLFTGECVCLKLFSRLYYYFTIGWNI FDFV VVILSIVGMFLA--EVIEKYFVSPTLFRVVRLARIGRILRLIKGAKG  
QQVFDISIMILICLNMTMMVETDDQSKEMETILYWINLVFIVLFTGECVCLKLISLRHYYFTIGWNI FDFV VVILSIVGMFLA--EMIEKYFVSPTLFRVIRLARIGRILRLIKGAKG  
KQAFDITIMVLICLNMTMMIETDDQGELMONILYWINLVFVVLFTGECVFKLFSRLYYYFTIGWNI FDFV VVILSIVGMFLA--KVIEKYFVSPTLFRVVRLARIGRILRLIKGAKG  
KQAFDITIMVLICLNMTMMIETDDQGELMONILYWINLVFVVLFTGECVFKLFSRLYYYFTIGWNI FDFV VVILSIVGMFLA--EMIEKYFVSPTLFRVIRLARIGRILRLIKGAKG  
KQAFDITIMVLICLNMTMMIETDDQGELMONILYWINLVFVVLFTGECVFKLFSRLYYYFTIGWNI FDFV VVILSIIIGMFLA--EVIEKYFVSPTLFRVIRLARIGRILRLIKGAKG  
KQVFDITIMILICLNMTMMVETDDQSELKTSVLYQINLVFIVVFTGECVCLKMFALRYYYFTIGWNI FDFV VVILSIVGMFLA--DIEEKYFVSPTLFRVIRLARIGRVLRLIRGAKG

|                                   |                       |                    |                               |               |         |          |                           |
|-----------------------------------|-----------------------|--------------------|-------------------------------|---------------|---------|----------|---------------------------|
| gi 677465800  <i>N. notabilis</i> | KQVFDIVIMILICLNMTMMVE | TDDQSELKTSVLYKINL  | VFIVIFTGECVLKMFALRHYFFTIGWNI  | FDV FVVVILSIL | GLVLS-- | DIIEKYFV | SPTLFRVIRLARIGRVLRLIRGAKG |
| gi 677394262  <i>L. discolor</i>  | KQAFDVSIMILICLNMTMMVE | TDDQSQEKVNILHKNIML | VFVAIFTGECIKMLALRHYFTNGWNI    | FDV FVVVILSIV | STVLS-- | DIIQKYFF | SPTLFRVIRLARIGRILRLIRGAKG |
| gi 723551436  <i>B. regulorum</i> | KQVFDIIIMILICLNMTMMVE | TDDQSELKTSVLYKINL  | VFIVIFTGECVLKMFALRYYYFTIGWNI  | FDV FVVVILSIL | GLVLS-- | DIIEKYFV | SPTLFRVIRLARIGRVLRLIRGAKG |
| gi 678995589  <i>E. helias</i>    | KQAFDITVMVLICLNMTMMIE | TDDQGELMERILYWINL  | VFVVLFTGECVFKMFSLRCCYYFTIGWNV | FDV FVVVILSIV | GMFLA-- | KVIEEYFV | SPTLFRVIRLARIGRILRLIRGAKG |

**Figure S2. MSA of voltage-sensor domain (VSD) (DIV) of bird Na<sup>+</sup> channels.** Loops involved in interaction with  $\alpha$ -toxins are boxed in orange where three sites responsible for binding to Lqh2, an  $\alpha$ -toxin from *Leiurus quinquestriatus hebraeus* (3), are shadowed in yellow.

|                                      |                        |                      |                 |                   |               |               |                                       |                           |
|--------------------------------------|------------------------|----------------------|-----------------|-------------------|---------------|---------------|---------------------------------------|---------------------------|
| gi 343098400  <i>A. carolinensis</i> | KQAFDISIMILICLNMTMMVE  | TDDQTDAMETNLYRINL    | IFIVLFTGECVLKLI | SLRYYYFTIGWNI     | FDV FVVVILSIV | GMFLAEIIEKYFV | SPTLFRVIRLARIGRILRLIRGAKG             |                           |
| gi 343098402  <i>A. carolinensis</i> | KQAFDISIMILICLNMTMMVE  | TDDQSKEMETILSRINL    | VFIIIFTGECVLKLI | SLRHYFFTIGWNI     | FDV FVVVILSIV | GMFLAEIIEKYFV | SPTLFRVIRLARIGRILRLIRGAKG             |                           |
| gi 637324084  <i>A. carolinensis</i> | RQVFDISIMILICLNMTMMVE  | TDDQSQQTTEILYRINL    | IFIVLFTGECVLKLI | SLRYYYFTIGWNI     | FDV FVVVILSIV | GMFLAEIIEKYFV | SPTLFRVIRLARIGRILRLIRGAKG             |                           |
| gi 641451020  <i>A. carolinensis</i> | QQAFDILIMLLICLNMTMMVE  | TDTQSKQMEEILYWINL    | VFVIFTCECVLKM   | FALRHYFFTIGWNI    | FDV FVVVILSIV | GMFLAEIIEKYFV | SPTLFRVIRLARIGRILRLIRGAKG             |                           |
| gi 343098410  <i>A. carolinensis</i> | RQAFDIGIMSLICLNMTMMVE  | TDDQSKQMEEILYWINL    | VFVIFTCECVLKM   | FALRHYFFTIGWNI    | FDV FVVVILSIV | GMFLAEIIEKYFV | SPTLFRVIRLARIGRILRLIRGAKG             |                           |
| gi 343098406  <i>A. carolinensis</i> | NQAFDVCIMLLICLNMTMMVE  | TDDQSPEKVNILYKINM    | VFVAIFTAECISK   | LVALRHYFFTNGWNI   | FDV FVVVILSIV | GSVLSDI       | IQKYFFSPTLFRVIRLARIGRILRLIRGAKG       |                           |
| gi 343098404  <i>A. carolinensis</i> | QQAFDIVIMILICLNMTMMVE  | TDDQSQTKIDILFQINL    | IFVIFTTECF      | LKMIALRYYYFTVGWNI | FDV FVVVILSIV | GLVLSDL       | IEKYFVSPPTLFRVIRLARIGRVLRLIRGAKG      |                           |
| gi 675822220  <i>T. sirtalis</i>     | KQAFDISIMILICLNMTMMVE  | TDDQTDAMETILYRINL    | IFIVLFTGECVLKLI | SLRYYYFTIGWNI     | FDV FVVVILSIV | GMFLAEIIEKYFV | SPTLFRVIRLARIGRILRLIRGAKG             |                           |
| gi 675822222  <i>T. sirtalis</i>     | KQAFDITIMILICLNMTMMVE  | TDDQSKEMETILSRINL    | VFIIIFTGECVLKLI | SLRHYFFTIGWNI     | FDV FVVVILSIV | GMFLAEIIEKYFV | SPTLFRVIRLARIGRILRLIRGAKG             |                           |
| gi 675822218  <i>T. sirtalis</i>     | QQVFDISIMILICLNMTMMVE  | TDDQSKQTEEDILYRINL   | IFIVLFTGECVLKLI | SLRYYYFTIGWNI     | FDV FVVVILSIV | GMFLAEIIEKYFV | SPTLFRVIRLARIGRILRLIRGAKG             |                           |
| gi 675822226  <i>T. sirtalis</i>     | QQAFDILIMLLICLNMTMMVE  | TDTQSKQMEEILYWINL    | VFVIFTCECVLKM   | FALRHYFFTIGWNI    | FDV FVVVILSVV | GMFLAEIIEKYFV | SPTLFRVIRLARIGRILRLIRGAKG             |                           |
| gi 675822228  <i>T. sirtalis</i>     | KQAFDIGIMILICLNMTMMVE  | TADQDTSVEDILYWINL    | IFIVLFTAEC      | LLKLI             | ALRYYYFTIGWNI | FDV FVVVIF    | SIVGMCLSKIIEKFFV                      | SPTLFRVIRLARIGRILRLIRGAKG |
| gi 60265593  <i>T. sirtalis</i>      | QQAFDIIIMILICLNMTMMVE  | TDDQSQTKITILAQINL    | VFIIIFTSECF     | LKMIALRHYFFTNGWNI | FDV FVVVILSIV | GLVLSDI       | IEKYFVSPPTLFRVIRLARIGRVLRLIRGAKG      |                           |
| gi 60265591  <i>T. sirtalis</i>      | QQAFDIIIMILICLNMTMMVE  | TDDQSQTKITILAQINL    | VFIIIFTSECF     | LKMIALRHYFFTNGWNI | FDV FVVVILSIV | GLVLSDI       | IEKYFVSPPTLFRVIRLARIGRVLRLIRGAKG      |                           |
| gi 602644140  <i>P. bivittatus</i>   | KQAFDISIMILICLNMTMMVE  | TDDQSKEMETILSRINL    | VFIVLFTGECILKLI | SLRHYFFTIGWNI     | FDV FVVVILSIV | GMFLAEIIEKYFV | SPTLFRVIRLARIGRILRLIRGAKG             |                           |
| gi 602651607  <i>P. bivittatus</i>   | RQVFDISIMILICLNMTMMVE  | TDDQSKQTEEDILYRINL   | IFIVLFTGECVLKLI | SLRYYYFTIGWNI     | FDV FVVVILSIV | GMFLAEIIEKYFV | SPTLFRVIRLARIGRILRLIRGAKG             |                           |
| gi 602629712  <i>P. bivittatus</i>   | QQAFDIIIMLLICLNMTMMVE  | TDTQSKQMEEILYWINL    | VFVIFTCECVLKM   | FALRHYFFTIGWNI    | FDV FVVVILSIV | GMFLAEIIEKYFV | SPTLFRVIRLARIGRILRLIRGAKG             |                           |
| gi 602669993  <i>P. bivittatus</i>   | HQLFDIAIMTLLICLNMTMMVE | ADDQSPEKTYVLNKNIL    | LFITLFTTECAM    | KLVALRHYFFINGWNI  | FDL VVVVIMSIV | GNVLSG        | IVVS-F-SPTLFRVIRLVIRIGRILRLIRSARG     |                           |
| gi 602642869  <i>P. bivittatus</i>   | NQAFDVCIMLLICLNMTMMVE  | TDDQSPEKVNILYRINM    | VFVAIFTAECIF    | KMTALRHYFFTNGWNI  | FDV FVVVILSIV | GSVLSDI       | IQKYFFSPTLFRVIRLARIGRILRLIRGAKG       |                           |
| gi 602636073  <i>P. bivittatus</i>   | QQAFDIVIMILICLNMTMMVE  | TDDQSQTKINILAQINL    | VFIIIFTSECF     | LKMIALRHYFFTNGWNI | FDV FVVVILSIV | GLVLADI       | IEKYFVSPPTLFRVIRLARIGRVLRLIRGAKG      |                           |
| gi 602672446  <i>P. bivittatus</i>   | RQAFDIGIMVLICLNMTMMVE  | TADQDSSVEEILYWINL    | IFVIFTGEC       | LLKLI             | ALRYYYFTIGWNI | FDV FVVVIF    | SIVGMCLSQIIEKFFV                      | SPTLFRVIRLARIGRVLRLIRGAKG |
| gi 565318632  <i>O. hannah</i>       | KQAFDISIMILICLNMTMMVE  | TDDQSKEMETILSRINL    | VFIIIFTGECILKLI | SLRHYFFTIGWNI     | FDV FVVVILSIV | GMFLAEIIEKYFV | SPTLFRVIRLARIGRILRLIRGAKG             |                           |
| gi 565312590  <i>O. hannah</i>       | QQAFDILIMLLICLNMTMMVE  | TDTQSKQMEDILYWINL    | VFVIFTCECVLKM   | FALRHYFFTIGWNI    | FDV FVVVILSIV | GMFLAEIIEKYFV | SPTLFRVIRLARIGRILRLIRGAKG             |                           |
| gi 565307265  <i>O. hannah</i>       | KQAFDIGIMILICLNMTMMVE  | TADQDSSVEEILYWINL    | FFVIFTGEC       | LLKLI             | ALRYYYFTIGWNI | FDV FVVVIF    | SIVGMCLSQIIEKFFV                      | SPTLFRVIRLARIGRVLRLIRGAKG |
| gi 565321537  <i>O. hannah</i>       | QQVFDISIMILICLNMTMMVE  | TDDQSKKTEEDILYRINL   | IFIVLFTGECVLKLI | SLRYYYFTIGWNI     | FDV FVVVILSIV | GMFLAEIIEKYFV | SPTLFRVIRLARIGRILRLIRGAKG             |                           |
| gi 565321905  <i>O. hannah</i>       | KQAFELFIIISLIFLNVM     | AVEYEGQDVAADQLLEKINC | VFVALFTGEC      | VMKLLALR          | LYFFKDSWNI    | FDL VVVVILSII | SLAATQLWQRLNFPPTILRVIRVIRISRLRLIRGARG |                           |
| gi 253910955  <i>T. couchii</i>      | QQAFDIIIMILICLNMTMMVE  | TDDQSQTKINILAQINL    | VFIIIFTSECF     | LKMIALRHYFFTNGWNI | FDV FVVVILSIV | GLVLSDI       | IEKYFVSPPTLFRVIRLARIGRVLRLIRGAKG      |                           |
| gi 253910953  <i>T. elegans</i>      | QQAFDIVIMILICLNMTMMVE  | TDDQSQTKINILAQINL    | VFIIIFTSECF     | LKMIALRHYFFTNGWNI | FDV FVVVILSIV | GLVLSDI       | IEKYFVSPPTLFRVIRLARIGRVLRLIRGAKG      |                           |

**Figure S3. MSA of VSD (DIV) of lizard Na<sup>+</sup> channels.** Sequence annotations are the same with those in Fig. S2 (the same below).



**Figure S4. MSA of VSD (DIV) of Na<sup>+</sup> channels from three mammalian species (*Rattus norvegicus*, *Mus musculus* and *Homo sapiens*).**





**Figure S5. MSA of VSD (DIV) of insect Na<sup>+</sup> channels.** These sequences are derived from nine insect Orders (bar in grey: *Diptera*; purple: *Hymenoptera*; orange: *Lepidoptera*; red: *Phthiraptera*; pale green: *Blattodea*; green: *Coleoptera*; pale blue: *Thysanoptera*; blue: *Blattaria*; black: *Hemiptera*).

**Supplementary Table 1** Parameter estimates and likelihood ratio statistics ( $2\Delta l$ ) for the scorpion  $\alpha$ -toxin gene from *M. martensii*

| Models                | $p$ | $l$     | Parameter estimates                                                                                                 | $2\Delta l$ | PSS                                                                                          |
|-----------------------|-----|---------|---------------------------------------------------------------------------------------------------------------------|-------------|----------------------------------------------------------------------------------------------|
| M0 (one-ratio)        | 1   | -1497.0 | $\omega = 0.85$                                                                                                     |             | None                                                                                         |
| M1a (neutral)         | 2   | -1448.0 | $p_0 = 0.46$ ( $p_1 = 0.54$ )<br>$\omega_0 = 0.08$ ( $\omega_1 = 1$ )                                               | 16.6        | Not allowed                                                                                  |
| M2a (selection)       | 4   | -1439.7 | $p_0 = 0.42$<br>$p_1 = 0.30$ ( $p_2 = 0.27$ )<br>$\omega_0 = 0.09$ ( $\omega_1 = 1$ )<br>$\omega_2 = \mathbf{2.47}$ |             | 2R*, 8K*, 9P*, 15E, 17A*,<br>18R**, 37Q, 38W, 39V*, 54N                                      |
| M7 (beta)             | 2   | -1450.2 | $p = 0.20$ , $q = 0.15$                                                                                             | 20.0        | Not allowed                                                                                  |
| M8 (beta & $\omega$ ) | 4   | -1440.2 | $p_0 = 0.64$ ( $p_1 = 0.38$ )<br>$p = 0.32$ , $q = 0.58$<br>$\omega_s = \mathbf{2.21}$                              |             | 2R*, 8K**, 9P**, <u>10H</u> , <u>13V</u> *, 15E*,<br>17A*, 18R**, 37Q*, 38W*, 39V**,<br>54N* |

Note:  $p$  is the number of parameters in the  $\omega$  distribution;  $l$  is the log likelihood. Twice the log likelihood differences ( $2\Delta l$ ) between null models and their alternative models: M1a/M2a=16.6 and M7/M8=20.0, both having  $\chi^2$  significant values of  $p < 0.001$ . PSSs identified by the Naïve Empirical Bayes (NEB) methods under M2a and M8 with P (posterior probabilities)  $\geq 0.9$  are shown and those  $\geq 0.99$  are indicated by \*\* and  $\geq 0.95$  by \*. Residues are numbered according to BmKM1. Two  $\omega$  values in M2a and M8, as indicators of positive selection, are boldfaced. M8-specific PSSs are underlined once.

**Supplementary Table 2** Log-likelihood values and parameter estimates under the fixed-sites models for Na<sub>v</sub> channel genes of birds

| Model                                                  | $p$ | $l$      | $r_2$ | $\kappa$                               | $\omega$                                 |
|--------------------------------------------------------|-----|----------|-------|----------------------------------------|------------------------------------------|
| A (homogeneous)                                        | 177 | -6494.05 | 1     | 2.74                                   | 0.091                                    |
| B (different $r_s$ )                                   | 178 | -6468.83 | 1.62  | 2.68                                   | 0.090                                    |
| C (different $r_s$ and $\pi_s$ )                       | 187 | -6454.74 | 1.41  | 2.57                                   | 0.090                                    |
| D (different $r_s$ , $\kappa$ and $\omega$ )           | 180 | -6459.54 | 1.51  | $\kappa_1 = 2.50$<br>$\kappa_2 = 3.35$ | $\omega_1 = 0.073$<br>$\omega_2 = 0.136$ |
| E (different $r_s$ , $\kappa$ , $\omega$ and $\pi_s$ ) | 189 | -6447.52 | 1.33  | $\kappa_1 = 2.55$<br>$\kappa_2 = 2.87$ | $\omega_1 = 0.074$<br>$\omega_2 = 0.131$ |
| F (separate analysis)                                  | 354 | -6340.11 | 1.52  | $\kappa_1 = 2.53$<br>$\kappa_2 = 2.92$ | $\omega_1 = 0.077$<br>$\omega_2 = 0.120$ |

Note:  $p$  is the number of parameters including 166 branch lengths in the tree. The first partition refers to the two extracellular loops and the second the remaining portion of the VSD.  $r_2$  is the rate of the second site partition relative to the rate of the first partition ( $r_1 = 1$ ).

**Supplementary Table 3** Log-likelihood values and parameter estimates under the fixed-sites models for Na<sub>v</sub> channel genes of lizards

| Model                                                  | $p$ | $l$      | $r_2$ | $\kappa$                               | $\omega$                                 |
|--------------------------------------------------------|-----|----------|-------|----------------------------------------|------------------------------------------|
| A (homogeneous)                                        | 65  | -3720.13 | 1     | 2.19                                   | 0.070                                    |
| B (different $r_s$ )                                   | 66  | -3689.90 | 2.20  | 2.13                                   | 0.064                                    |
| C (different $r_s$ and $\pi_s$ )                       | 75  | -3683.19 | 1.76  | 2.12                                   | 0.064                                    |
| D (different $r_s$ , $\kappa$ and $\omega$ )           | 68  | -3673.95 | 1.45  | $\kappa_1 = 2.54$<br>$\kappa_2 = 1.68$ | $\omega_1 = 0.047$<br>$\omega_2 = 0.124$ |
| E (different $r_s$ , $\kappa$ , $\omega$ and $\pi_s$ ) | 77  | -3666.68 | 1.18  | $\kappa_1 = 2.60$<br>$\kappa_2 = 1.58$ | $\omega_1 = 0.047$<br>$\omega_2 = 0.119$ |
| F (separate analysis)                                  | 130 | -3615.89 | 1.77  | $\kappa_1 = 2.53$<br>$\kappa_2 = 1.72$ | $\omega_1 = 0.049$<br>$\omega_2 = 0.102$ |

Note:  $p$  is the number of parameters including 54 branch lengths in the tree. Meanings for the two partitions of VSD and  $r_2$  are the same with those in Supplementary Table 2 (the same below).

**Supplementary Table 4** Log-likelihood values and parameter estimates under the fixed-sites models for Na<sub>v</sub> channel genes of mammals

| Model                                        | $p$ | $l$      | $r_2$ | $\kappa$                               | $\omega$                                 |
|----------------------------------------------|-----|----------|-------|----------------------------------------|------------------------------------------|
| A (homogeneous)                              | 63  | -3743.57 | 1     | 2.57                                   | 0.071                                    |
| B (different $r_s$ )                         | 64  | -3675.42 | 3.00  | 2.59                                   | 0.067                                    |
| C (different $r_s$ and $\pi_s$ )             | 73  | -3663.73 | 2.58  | 2.54                                   | 0.065                                    |
| D (different $r_s$ , $\kappa$ and $\omega$ ) | 66  | -3655.35 | 2.06  | $\kappa_1 = 2.90$<br>$\kappa_2 = 2.37$ | $\omega_1 = 0.043$<br>$\omega_2 = 0.135$ |
| E (different $r_s$ , $\kappa$ and $\pi_s$ )  | 75  | -3642.12 | 1.72  | $\kappa_1 = 3.05$<br>$\kappa_2 = 2.15$ | $\omega_1 = 0.042$<br>$\omega_2 = 0.130$ |
| F (separate analysis)                        | 126 | -3594.72 | 1.62  | $\kappa_1 = 3.12$<br>$\kappa_2 = 2.28$ | $\omega_1 = 0.038$<br>$\omega_2 = 0.123$ |

Note:  $p$  is the number of parameters including 52 branch lengths in the tree.

**Supplementary Table 5** Log-likelihood values and parameter estimates under the fixed-sites models for Na<sub>v</sub> channel genes of insects

| Model                                           | $p$ | $l$      | $r_2$ | $\kappa$                               | $\omega$                                 |
|-------------------------------------------------|-----|----------|-------|----------------------------------------|------------------------------------------|
| A (homogeneous)                                 | 99  | -4777.52 | 1     | 1.48                                   | 0.015                                    |
| B (different rs)                                | 100 | -4749.93 | 2.11  | 1.42                                   | 0.013                                    |
| C (different rs and $\pi$ s)                    | 109 | -4747.02 | 1.71  | 1.43                                   | 0.013                                    |
| D (different rs, $\kappa$ and $\omega$ )        | 102 | -4741.72 | 1.64  | $\kappa_1 = 1.31$<br>$\kappa_2 = 1.87$ | $\omega_1 = 0.010$<br>$\omega_2 = 0.024$ |
| E (different rs, $\kappa$ $\omega$ and $\pi$ s) | 111 | -4740.80 | 1.41  | $\kappa_1 = 1.38$<br>$\kappa_2 = 1.65$ | $\omega_1 = 0.010$<br>$\omega_2 = 0.021$ |
| F (separate analysis)                           | 198 | -4669.57 | 1.09  | $\kappa_1 = 1.38$<br>$\kappa_2 = 1.52$ | $\omega_1 = 0.008$<br>$\omega_2 = 0.023$ |

Note:  $p$  is the number of parameters including 88 branch lengths in the tree.

### Supplementary References

1. Xiong, Y. M., Ling, M. H., Wang, D. C. & Chi, C. W. The cDNA and genomic DNA sequences of a mammalian neurotoxin from the scorpion *Buthus martensii karsch*. *Toxicon* **35**, 1025-1031 (1997).
2. Luo, M. J. *et al.* Purification and sequences determination of a new neural mammalian neurotoxin from the scorpion *Buthus martensii karsch*. *Toxicon* **35**, 723-731 (1997).
3. Surtiere, P. *et al.* New toxins acting on sodium channels from the scorpion *Leiurus quinquestriatus hebraeus* suggest a clue to mammalian vs insect selectivity. *Toxicon* **36**, 1141-1154 (1998).
